# Supplementary material for: UV-B irradiation-activated E3 ligase GmILPA1 modulates gibberellin catabolism to increase plant height in soybean
Source: PubMed Central journal article supplement (PMC10560287; doi:10.1038/s41467-023-41824-3), 2023-10-07
Supplement: 41467_2023_41824_MOESM1_ESM.pdf [file 41467_2023_41824_MOESM1_ESM.pdf]

**UV-B irradiation-activated E3 ligase GmILPA1 modulates gibberellin catabolism to increase plant height in soybean**

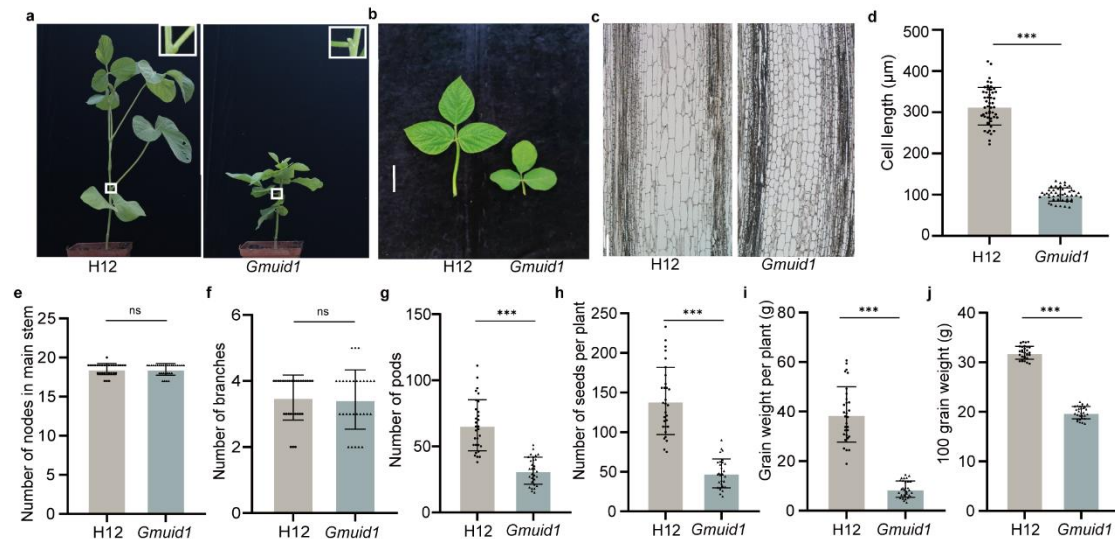

### Supplementary Fig. 1 Phenotypes of the wild-type Hedou 12 and the *Gmuid1* mutant

**a** Leaf petiole angle of Hedou 12 (H12) and *Gmuid1* at the V4 stage (four unrolled trifoliolate leaves). The inset shows an enlarged view of leaf petiole angle. **b** Uppermost leaf of H12 and *Gmuid1* at the V4 stage. **c** Longitudinal view of cells from the fifth internode of H12 and *Gmuid1* at the V5 stage (five unrolled trifoliolate leaves). **d** Cell length of the fifth internode in H12 and *Gmuid1*. ( $n = 50$  cells from three independent experiments,  $P = 2.77 \times 10^{-40}$ ). **e-f** Summary of agronomic traits in H12 and *Gmuid1*. ( $n = 20$  independent plants,  $P = 6.28 \times 10^{-12}$  in **g**,  $P = 1.62 \times 10^{-12}$  in **h**,  $P = 2.05 \times 10^{-20}$  in **i**,  $P = 1.41 \times 10^{-41}$  in **j**). In **d-j**, Data are presented as mean values  $\pm$  SD, Student's *t*-test was used for the significance test, \*\*\* $P < 0.001$ ; ns, not significant. Source data are provided as a Source Data file.

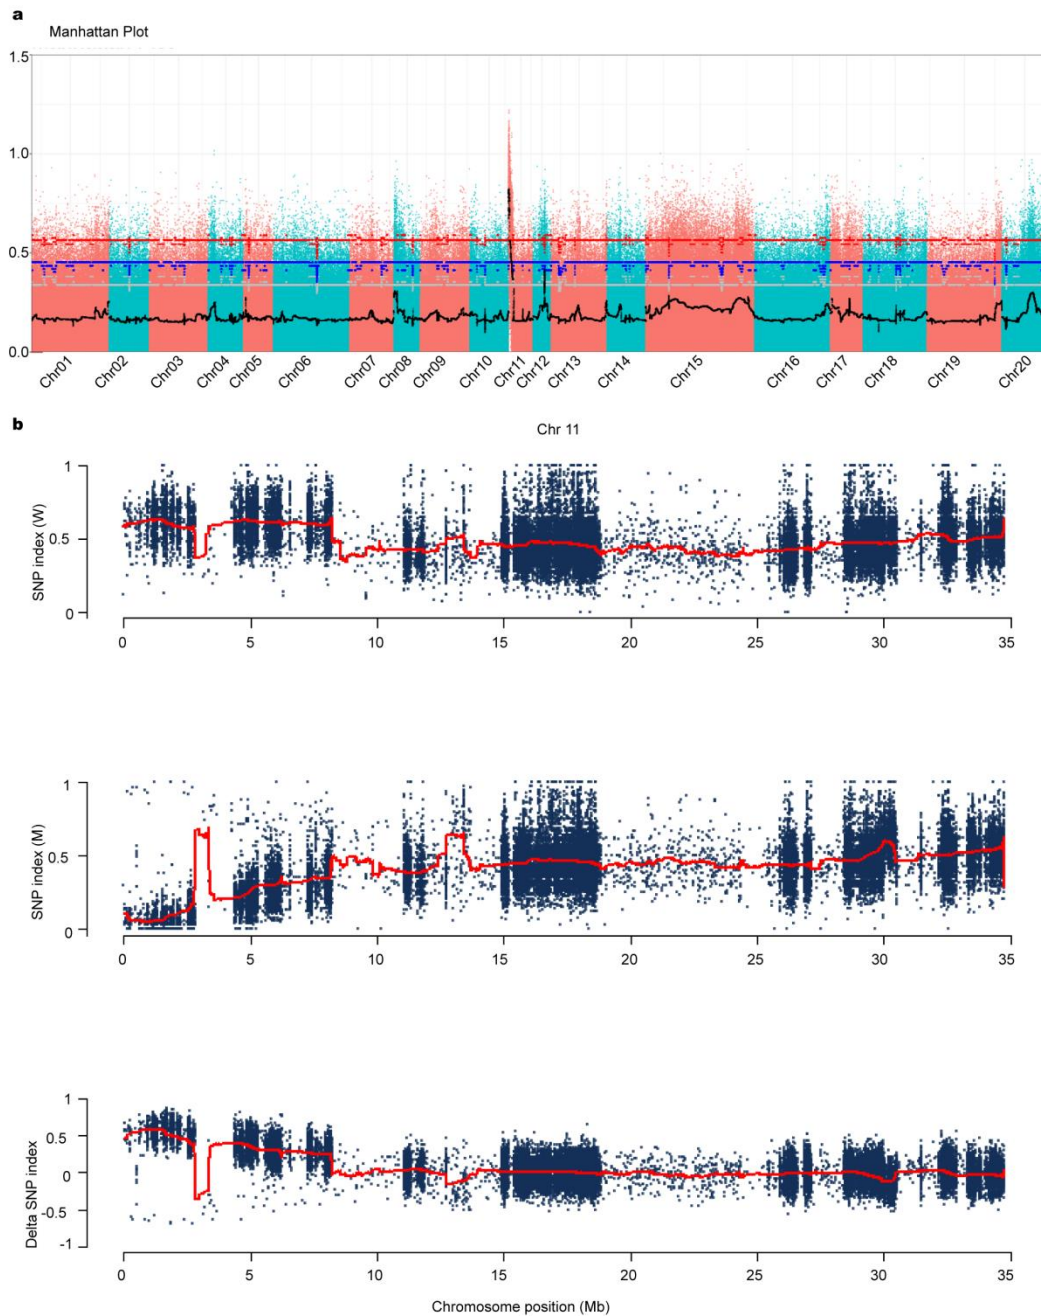

**Supplementary Fig. 2 Identification of *GmUID1* by bulked-segregant analysis**  
**a** Manhattan Map of Soybean 20 Chromosomes. **b** Mapping-by-sequencing of *Gmuid1*. SNP index ratio for pools of different phenotypic classes (top, wild-type phenotype in Pool W; middle panel, *Gmuid1* phenotype in Pool M). Bottom panel: delta (SNP index) between pool W and pool M, showing the enrichment for Hedou 12 (H12) SNPs at the top of chromosome 11.

```

GmUID1 ATGAGTCCAAAAGAGAGTTGCAGAAGTGAACCTCGCATTGCGATCCGCCAACTCAGTGATCGATGTCTCTACTCTGCTTC
Gmuid1 ATGAGTCCAAAAGAGAGTTGCAGAAGTGAACCTCGCATTGCGATCCGCCAACTCAGTGATCGATGTCTCTACTCTGCTTC
Consensus atgagt t ccaagagagt t gcagaagt gaact t cgc at t gcgat ccgccaaact cagt gat c gat gt ct ct act ct gct t c

GmUID1 TAAATG .....
Gmuid1 TAAATGGTACCCCTTACAAAAACCCCTAATTCAAAACAAATGGGGGTTCCACTTGACCTCAAGTTTTGAATTTGAAGTC
Consensus t aaat g

GmUID1 ..... GCCTGCAGAACAGTT
Gmuid1 CCCTTTTACTTTTCTGTGTGATTCCGCAAATGGGTGTTTGTCTGACGAAAATGTGGTTTCAAGGCTGCAGAACAGTT
Consensus ggct gcagaacagt t

GmUID1 GGTGGGTATTGAGCAAGACCCCTGCCAAGTTCACCTCCCTCGAACACGAGATTTCAGCGTGGGAGTTGAGCATTCCGAGGA
Gmuid1 GGTGGGTATTGAGCAAGACCCCTGCCAAGTTCACCTCCCTCGAACACGAGATTTCAGCGTGGGAGTTGAGCATTCCGAGGA
Consensus ggt ggg t at t gagcaagaccct gccaa g t t cact ccct cgaacacgagat t t cagcgt gggagt t cgagcat t cgcagga

GmUID1 AGTACAAGACTCAOGAGATCAOAGGAAACCCCAATCGCGGTGTTTCGTATGTTGCCAOGCCTGCGATGGAGGAAGATGAG
Gmuid1 AGTACAAGACTCAOGAGATCAOAGGAAACCCCAATCGCGGTGTTTCGTATGTTGCCAOGCCTGCGATGGAGGAAGATGAG
Consensus agt acaagact cagagat cacgggaaccccaat cgcgggt gt t t cgt at gt t gccacgcct gcgat ggaggaagat gag

GmUID1 CTTGTAGATGGTGATTTCTACCTTCTGGCAAAGTCTATTTTATTGCCGTGAGTATAAGAGAGCTGCTCATGTTCTT
Gmuid1 CTTGTAGATGGTGATTTCTACCTTCTGGCAAAGTCTATTTTATTGCCGTGAGTATAAGAGAGCTGCTCATGTTCTT
Consensus ct t gt agat ggt gat t t ct acct t ct ggcaaa g t cct at t t t gat t gccgt gagt at aagagagct gct cat gt t ct t

```

**b**

```

GmUID1 MSSKESCRSELRIAIRQLSDRCLYSASKWAAEQLVIEQDPAKFTPSNTRFQRGSSSIRR
Gmuid1 MSSKESCRSELRIAIRQLSDRCLYSASKWYPLQKP -
GmUID1 KYKTHEITGTPIAGVSVYVATPAMEEDELVDGDFYLLAKSYFDCREYKRAAHVLRDQNGRK
Gmuid1
GmUID1 SVFLRCHALYLAGEKRKEEEMIELEGLGKSDAVNHVELSLERELSTFRKNGKVDPFCL
Gmuid1
GmUID1 YLYGLVLKQKGSLENLARAVLVESVNSYPWNWNAWTELQSLCKTVDILNSLNLNSHWMKD
Gmuid1
GmUID1 FFLASVYQELRMHNDLSKYEYLLGTFSNS NYVQAQIAKAQYSLREFDQVEAIFEELLSN
Gmuid1
GmUID1 DPYRVEDMDMYSNVLYAKECFSAISYLAHRVFM TDKYRPECSCIIGNYYSKKGQHEKSV
Gmuid1
GmUID1 VYFRRALKLNKNFLSAWTLMGHEFVEMKNTPA AVDAYRRAVDIDPRDYRAWYGLGQAYE
Gmuid1
GmUID1 MMGMFPYALHYFKKSVFLQPND SRLWIAMAQCYETDQLRMLDEAIKCYRRAANCNDREA
Gmuid1
GmUID1 IALHNLAKLHSELGRPEEAFFYKDLERMESEEREGPKMVEALLYLAKYYRAQKFFEDA
Gmuid1
GmUID1 EVYCTRLLDYTGPERETAKSILRGM RSTQSNFSPMDVEHFPP-
Gmuid1

```

**Supplementary Fig. 3 Sequence alignment between wild-type and mutant *Gmuid1***

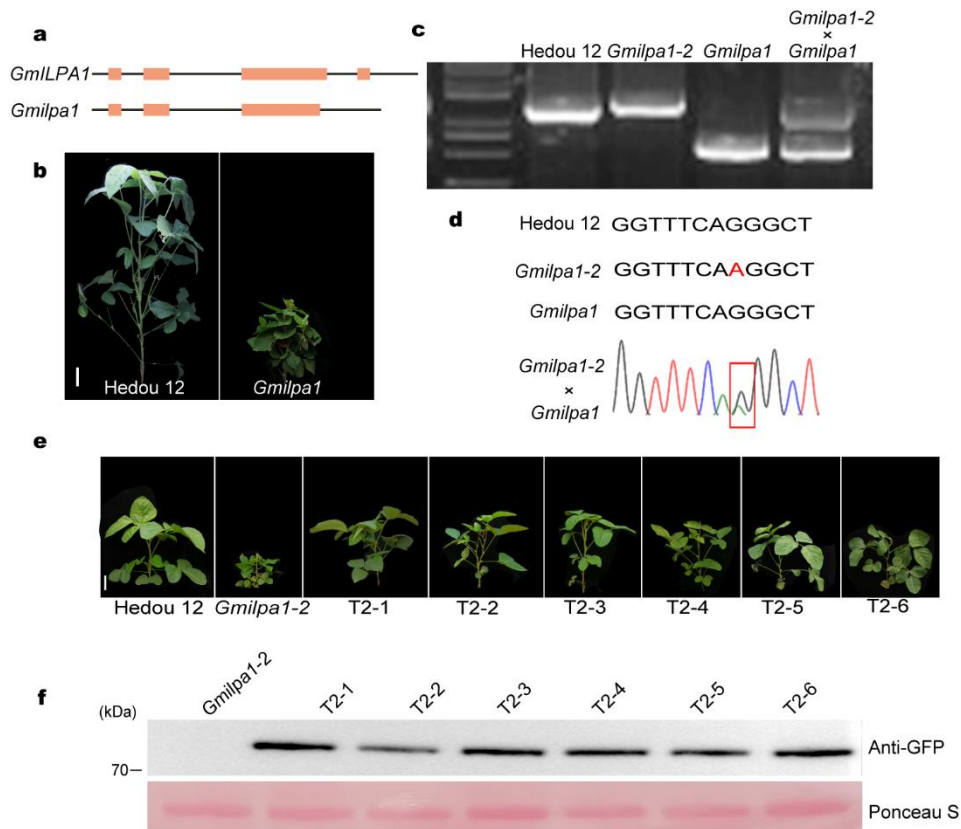

#### Supplementary Fig. 4 Identification of *GmILPA1*

**a-b** Schematic diagram of *GmILPA1* in H12 and the *Gmilpa1* mutant, which carries a 1,149-bp deletion that includes 23 bp from intron 3 and exon 4. **c-d** Genomic PCR and sequencing analysis of the *Gmilpa1-2*, *Gmilpa1*, and *Gmilpa1-2* × *Gmilpa1* F1 plants. **e** Representative images of H12, *Gmilpa1-2*, and T2 plants of six transformation events with the *GmILPA1-GFP* transgene. Scale bar, 10 cm. **f** Immunodetection of GFP in the *Gmilpa1-2* mutant and *Gmilpa1-2* T<sub>2</sub> plants expressing the *GmILPA1-GFP* transgene. Source data are provided as a Source Data file.



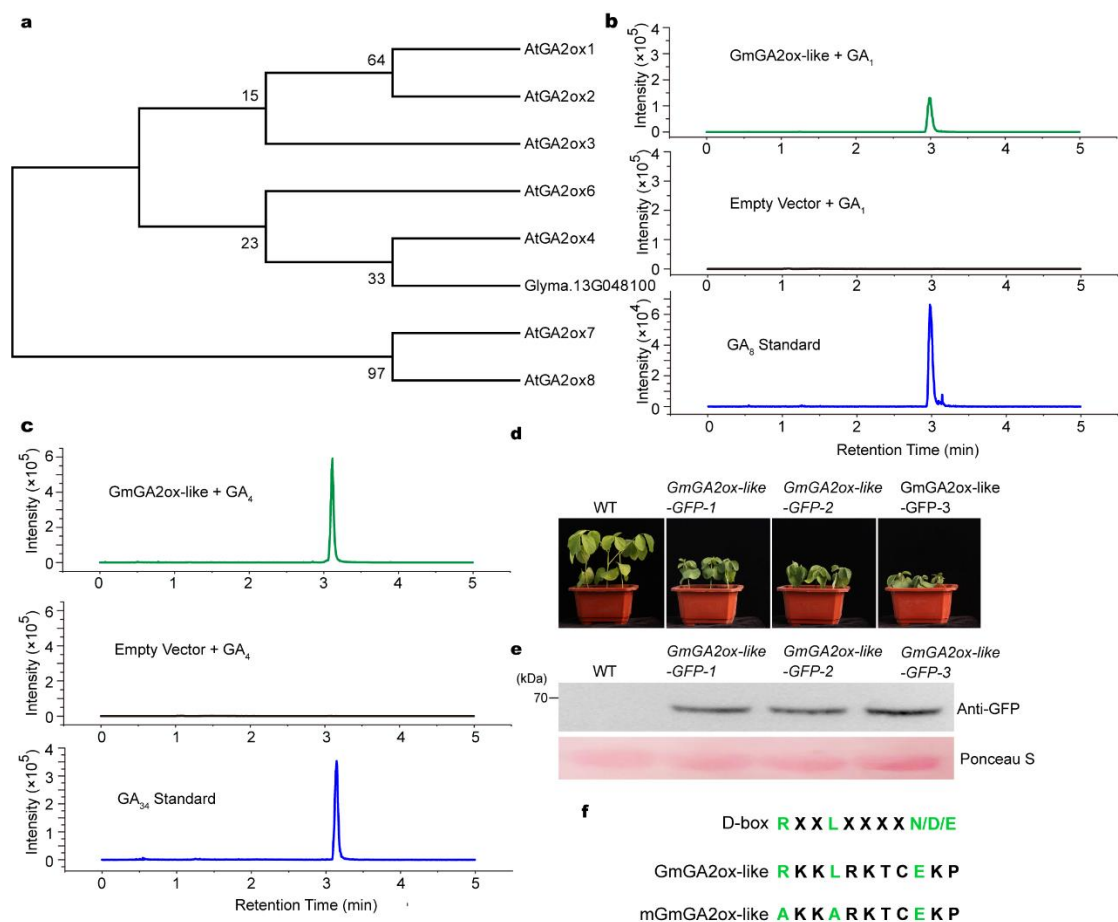

### Supplementary Fig. 6 Phylogeny analysis of GmGA2ox-like proteins and identification of transgenic plants

**a** Neighbour-joining phylogenetic tree of GmGA2ox-like proteins. The tree is based on proteins that encoded the GA2ox in *Arabidopsis*. The numbers at each branch represent the percentage support from 500 bootstrap replicates. **b-c** Conversion of GA<sub>1</sub> to GA<sub>8</sub> (**b**), GA<sub>4</sub> to GA<sub>34</sub> (**c**) by recombinant GmGA2ox-like protein. Reaction with GST was used as mock. The vertical axis represents the ion signal intensity. **d** Representative images of Hedou 12 (H12) and *GmGA2ox-like-GFP* overexpression lines. **e** Immunodetection of GFP in H12 and *35S:GmGA2ox-like-GFP*. **f** Conserved D-box motif and its mutated construct of GmGA2ox-like. Source data are provided as a Source Data file.

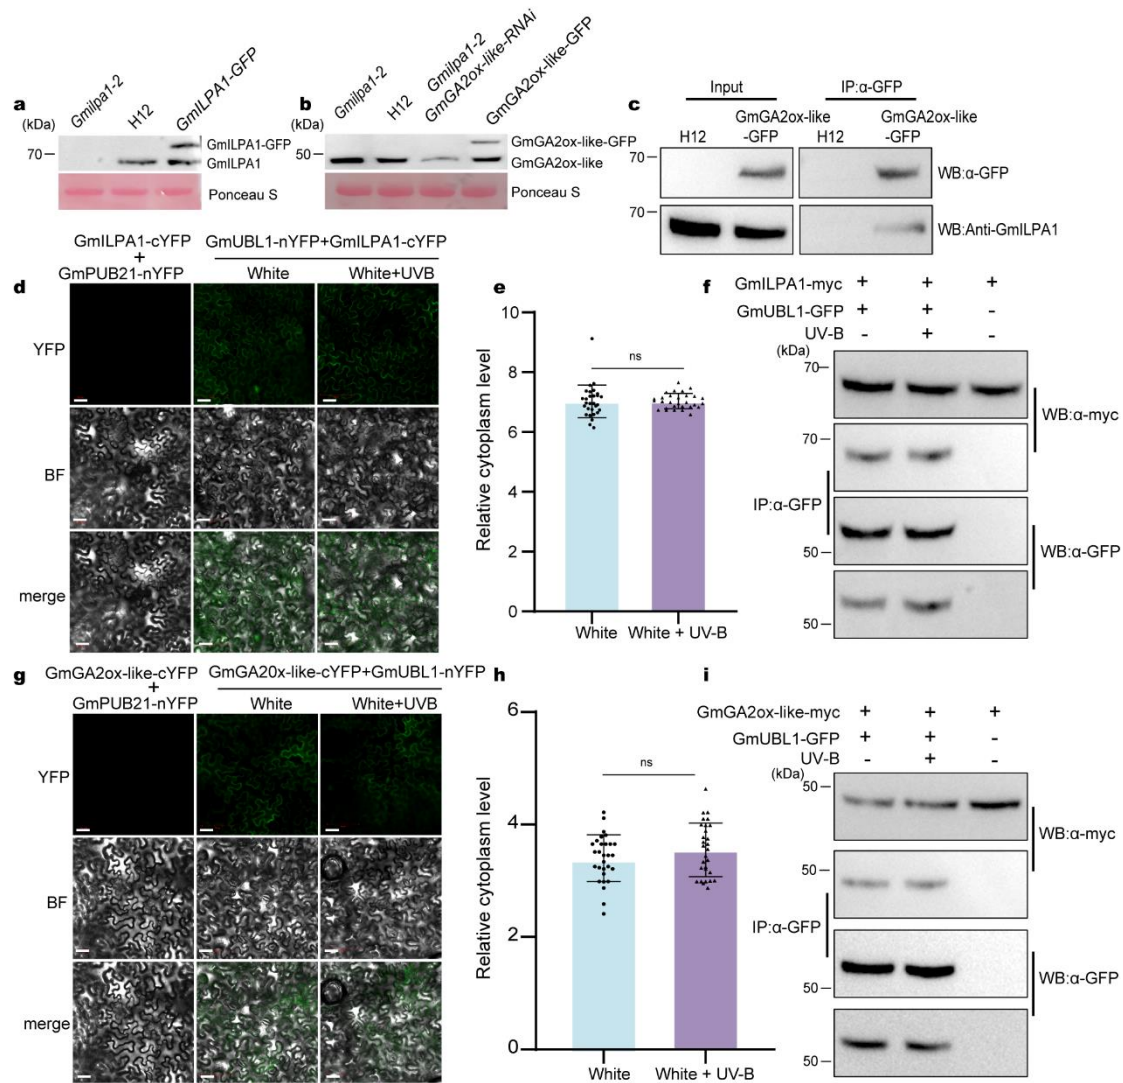

**Supplementary Fig. 7 Interaction between *GmILPA1* and *GmUBL1*, *GmUBL1*, and *GmGA2ox-like* upon exposure to UV-B light**

**a** Specificity of anti- *GmILPA1* antibody. Total proteins extracted from H12, *Gmilpa1-2*, and *GmILPA1-GFP* seedlings were used for immunoblotting analysis with anti-*GmILPA1* antibody. **b** Specificity of anti-*GmGA2ox-like* antibody. Total proteins extracted from H12, *Gmilpa1-2*, *Gmilpa1-2/GmGA2ox-like-RNAi*, and *GmGA2ox-like-GFP* seedlings were used for immunoblotting analysis with anti-*GmGA2ox-like* antibody. **c** Co-immunoprecipitation assays using seedlings expressing *35S:GmGA2ox-like-GFP*. Immunoprecipitation was performed using GFP-Trap agarose beads, and the immunoblots were probed using anti- *GmILPA1* and anti-GFP antibodies. **d** BiFC assays indicating that UV-B treatment did not promote the interaction between *GmILPA1* and *GmUBL1*. Scale bars, 50  $\mu$ m. **e** Relative YFP fluorescence intensity in the cytoplasm from the images in panel (**d**). ( $n = 30$  cells,  $P = 0.9445$ ), the relative fluorescence intensities of cytoplasm and whole cells were quantified and the cytoplasm-to- background ratios are plotted. Data are presented as mean values  $\pm$  SD, Student's  $t$ -test was used for the significance test, ns, not significant. **f** CoIP assays showed that UV-B did not increase the interaction between *GmILPA1* and *GmUBL1*.



**g** BiFC assays indicating that UV-B treatment did not promote the interaction between GmGA2ox-like and GmUBL1. Scale bars, 50  $\mu\text{m}$ . **h** ( $n = 30$  cells,  $P = 0.2116$ ), the relative fluorescence intensities of cytoplasm and whole cells were quantified and the cytoplasm-to- background ratios are plotted. Data are presented as mean values  $\pm$  SD, Student's *t*-test was used for the significance test, ns, not significant. **i** CoIP assays showed that UV-B did not increase the interaction between GmGA2ox-like and GmUBL1. Source data are provided as a Source Data file.

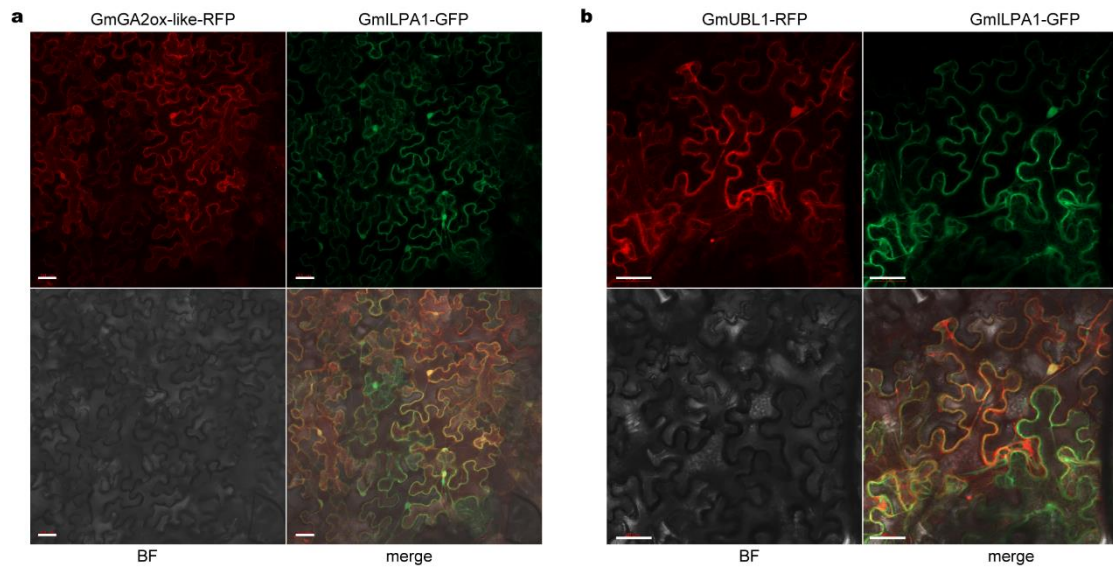

**Supplementary Fig. 8 Co-localization of GmILPA1 and GmGA2ox-like, GmILPA1 and GmUBL1**

**a** *N. benthamiana* leaves were co-infiltrated with *GmILPA1-GFP* and *GmGA2ox-like-RFP*. **b** *N. benthamiana* leaves were co-infiltrated with *GmILPA1-GFP* and *GmUBL1-RFP*. Scale bars, 50  $\mu\text{m}$ .

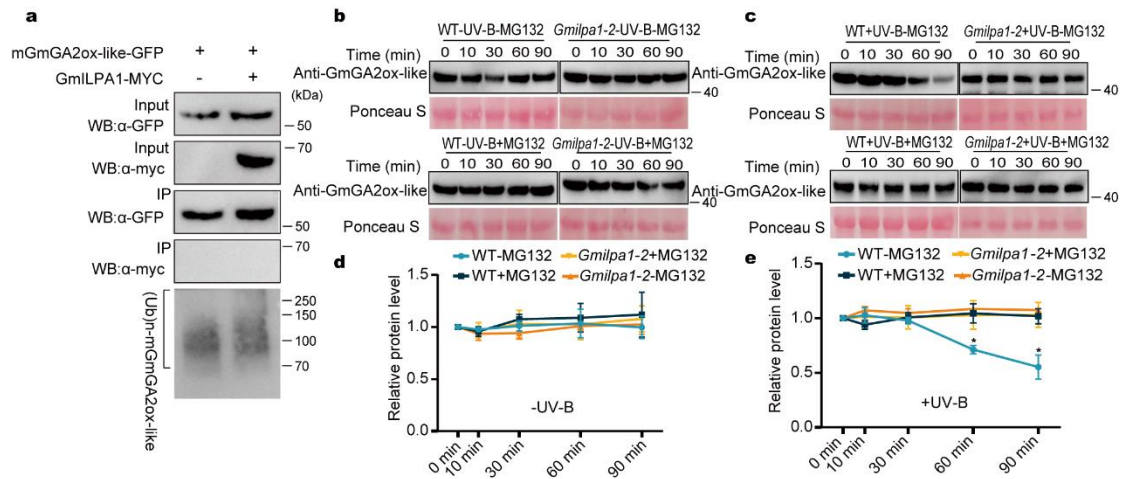

### Supplementary Fig. 9 GmILPA1 mediates degradation of GmGA2ox-like

**a** Ubiquitination of mGmGA2ox-like by GmILPA1. mGmGA2ox-like-GFP and GmILPA1-MYC were co-infiltrated in *N. benthamiana* leaves. Total protein extracts were immunoprecipitated using anti-GFP antibody-conjugated agarose beads, followed by immunoblotting with anti-ubiquitin antibody. **b-c** GmGA2ox-like degradation in cell-free degradation assays. Total proteins extracted from WT or *Gmipa1-2* seedlings were incubated with or without MG132 and exposed to UVB or maintained in white light for the indicated time. GmGA2ox-like abundance was detected with anti-GmGA2ox-like antibody and quantified (**d** and **e**). Data are presented as mean values  $\pm$  SE,  $n = 3$  independent experiments. Source data are provided as a Source Data file.

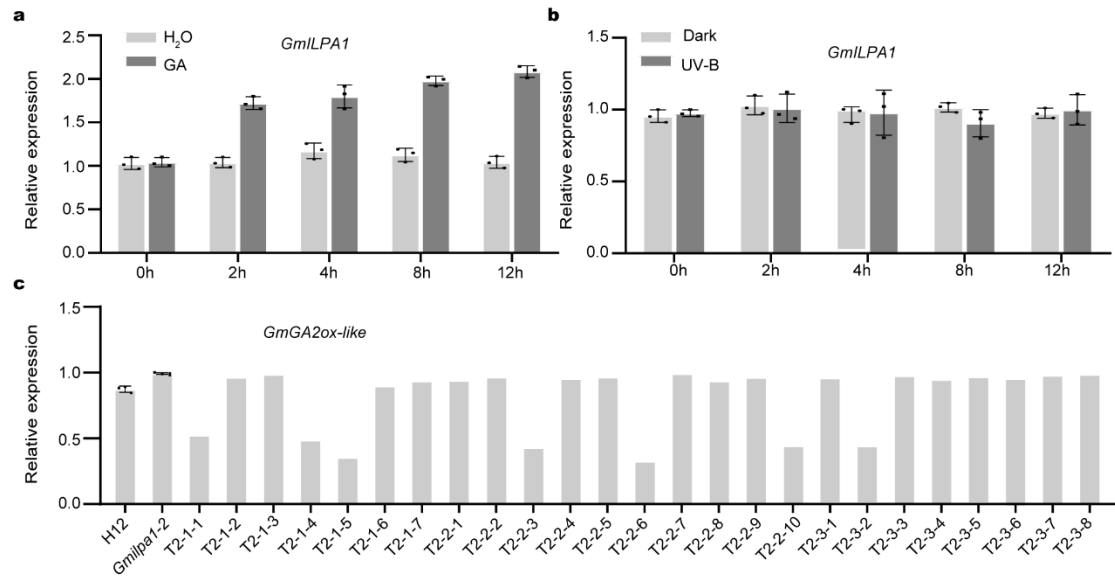

**Supplementary Fig. 10 *GmILPA1* transcript levels are differentially regulated by GA<sub>3</sub> and UV-B**

**a** Relative expression levels of *GmILPA1* in Hedou 12 (H12) at V1 stage treated with **exogenous GA<sub>3</sub>** as detected by RT-qPCR. **b** Relative expression levels of *GmILPA1* in H12 at the V1 stage exposed to UV-B light as detected by RT-qPCR. Seedlings of H12 grown in darkness for 1 day and then transferred to UV-B for the indicated times. Data are presented as mean values  $\pm$  SE,  $n = 3$  biologically independent samples. **c** Relative expression levels of *GmGA2ox-like* in Hedou 12 (H12), *Gmilpa1-2* and T2 plants of two transgene lines of *GmGA2ox-like-RNAi* in *Gmilpa1-2*.

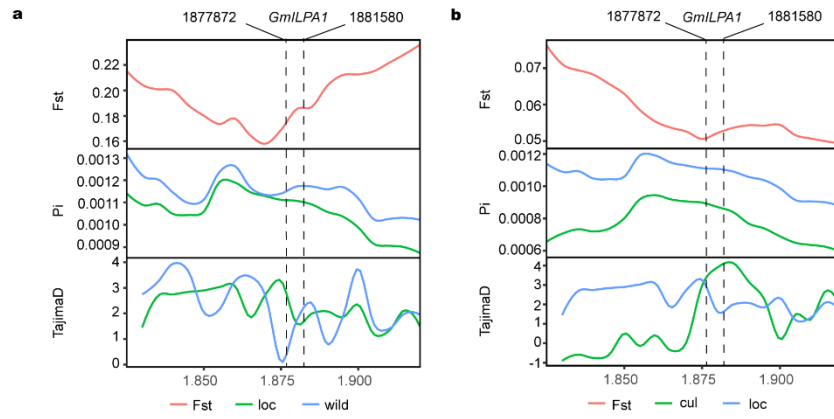

**Supplementary Fig. 11 Evolution and geographical distribution of *GmILPA1* haplotypes**

**a-b**  $F_{ST}$ , nucleotide diversity, and Tajima's D values over an ~100-kb region centered on *GmILPA1* among wild, landrace, and soybean germplasms.

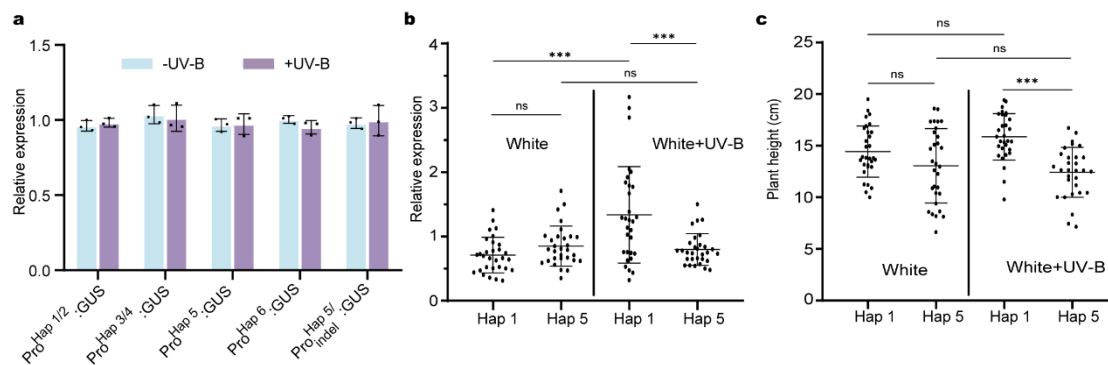

**Supplementary Fig. 12 Relative expression of *GmILPA1* in *Hap1* and *Hap5* and plant height in *Hap1* and *Hap5* with and without UV-B exposure**

**a** Relative expression of *Bar* of in *N. benthamiana* leaves infected with GUS vectors with and without UV-B exposure. Data are presented as mean values +/- SD,  $n = 3$  biologically independent samples. **b** Relative expression of *GmILPA1* with and without UV-B exposure in *Hap1* and *Hap5*. ( $n = 30$  soybean accessions;  $P = 6.94 \times 10^{-5}$  in white and white + UV-B for Hap 1,  $P = 4.36 \times 10^{-4}$  in Hap 1 and Hap 5 under white + UV-B condition). **c** Height of plants with the or *Hap1* and *Hap5* allele with and without UV-B exposure. ( $n = 30$  soybean accessions;  $P = 4.24 \times 10^{-7}$  in Hap 1 and Hap 5 under white + UV-B condition). Data are presented as mean values +/- SD;  $P$ -value is calculated with a one-way ANOVA analysis–Tukey comparison, and the columns labeled without the same alphabet are significantly different ( $P < 0.05$ , two-sided). \*\*\* $P < 0.001$ , ns, not significant. Source data are provided as a Source Data file.
