# Supplementary material for: UV-B irradiation-activated E3 ligase GmILPA1 modulates gibberellin catabolism to increase plant height in soybean
Source: PubMed Central journal article supplement (PMC10560287; doi:10.1038/s41467-023-41824-3), 2023-10-07
Supplement: 41467_2023_41824_MOESM3_ESM.pdf [file 41467_2023_41824_MOESM3_ESM.pdf]

### **Description of Additional Supplementary Files**

File Name: Supplementary Data 1

Description: Ion's detection information for GA content determination

File Name: Supplementary Data 2

Description: Primers used in this study
